# Supplementary material for: Regio- and stereochemical stability induced by anomeric and gauche effects in difluorinated pyrrolidines
Source: publisher site journal article supplement (doi:10.3762/bjoc.20.140), 2024-07-12
Supplement: Additional file 1 [file 1860-5397-20-140-S1.pdf]

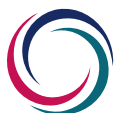

## Supporting Information

for

### **Regio- and stereochemical stability induced by anomeric and *gauche* effects in difluorinated pyrrolidines**

Ana Flávia Candida Silva, Francisco A. Martins and Matheus P. Freitas

*Beilstein J. Org. Chem.* **2024**, *20*, 1572–1579. [doi:10.3762/bjoc.20.140](https://doi.org/10.3762/bjoc.20.140)

### **Standard orientations for the difluorinated pyrrolidines in the gas phase and DMSO**

Pages S2–S6: Standard orientations for the difluorinated pyrrolidines (gas phase, B3LYP-GD3BJ/6-311++G\*\*).

Pages S7–S12: Standard orientations for the difluorinated pyrrolidines (DMSO, B3LYP-GD3BJ/6-311++G\*\*).

Standard orientations for the difluorinated pyrrolidines (gas phase, B3LYP-GD3BJ/6-311++G\*\*)

### 1

| Coordinates (Angstroms) |               |             |           |           |           |
|-------------------------|---------------|-------------|-----------|-----------|-----------|
| Center Number           | Atomic Number | Atomic Type | X         | Y         | Z         |
| 1                       | 6             | 0           | -0.207852 | -1.337734 | -0.400837 |
| 2                       | 6             | 0           | 0.697527  | -0.489806 | 0.495450  |
| 3                       | 6             | 0           | 0.016870  | 0.879619  | 0.467467  |
| 4                       | 6             | 0           | -1.606124 | -0.700101 | -0.229161 |
| 5                       | 1             | 0           | 0.146700  | -1.232763 | -1.427113 |
| 6                       | 1             | 0           | -0.186703 | -2.393517 | -0.133551 |
| 7                       | 1             | 0           | 0.730413  | -0.852481 | 1.525352  |
| 8                       | 1             | 0           | 0.330855  | 1.582063  | 1.238604  |
| 9                       | 1             | 0           | -2.285022 | -1.346602 | 0.331479  |
| 10                      | 1             | 0           | -2.064415 | -0.485346 | -1.199220 |
| 11                      | 7             | 0           | -1.337871 | 0.528173  | 0.547253  |
| 12                      | 9             | 0           | 0.358288  | 1.517676  | -0.771125 |
| 13                      | 9             | 0           | 2.007517  | -0.447063 | 0.035434  |
| 14                      | 1             | 0           | -2.001499 | 1.284043  | 0.457379  |

G° (Hartree-Fock) -411.1320928

Imag. Freq. = 0

### 2

| Coordinates (Angstroms) |               |             |           |           |           |
|-------------------------|---------------|-------------|-----------|-----------|-----------|
| Center Number           | Atomic Number | Atomic Type | X         | Y         | Z         |
| 1                       | 6             | 0           | -0.726367 | -0.829764 | 0.900838  |
| 2                       | 6             | 0           | -0.710186 | 0.599955  | 0.363490  |
| 3                       | 6             | 0           | 0.608253  | 0.670790  | -0.399903 |
| 4                       | 6             | 0           | 0.179231  | -1.635418 | -0.061812 |
| 5                       | 1             | 0           | -0.316849 | -0.836240 | 1.911860  |
| 6                       | 1             | 0           | -1.748224 | -1.206089 | 0.942732  |
| 7                       | 1             | 0           | -0.793146 | 1.373293  | 1.125034  |
| 8                       | 1             | 0           | 0.689997  | 1.476620  | -1.126895 |
| 9                       | 1             | 0           | -0.385474 | -2.358069 | -0.654301 |
| 10                      | 1             | 0           | 0.951067  | -2.177647 | 0.4933355 |
| 11                      | 7             | 0           | 0.746107  | -0.604317 | -0.943427 |
| 12                      | 1             | 0           | 1.599440  | -0.813595 | -1.439387 |
| 13                      | 9             | 0           | 1.617503  | 0.975409  | 0.603751  |
| 14                      | 9             | 0           | -1.764630 | 0.795544  | -0.544205 |

G° (Hartree-Fock) -411.1358488

Imag. Freq. = 0

### 3

| Coordinates (Angstroms) |               |             |          |           |          |
|-------------------------|---------------|-------------|----------|-----------|----------|
| Center Number           | Atomic Number | Atomic Type | X        | Y         | Z        |
| 1                       | 6             | 0           | 0.971306 | -0.390336 | 0.983068 |
| 2                       | 6             | 0           | 0.362726 | 0.845371  | 0.340660 |

|    |   |   |           |           |           |
|----|---|---|-----------|-----------|-----------|
| 3  | 6 | 0 | -0.850108 | 0.289100  | -0.405349 |
| 4  | 6 | 0 | 0.714522  | -1.491054 | -0.059176 |
| 5  | 1 | 0 | 2.026826  | -0.249700 | 1.214486  |
| 6  | 1 | 0 | 0.432212  | -0.603765 | 1.908982  |
| 7  | 1 | 0 | 0.116551  | 1.659201  | 1.019877  |
| 8  | 1 | 0 | -1.152159 | 0.888382  | -1.263850 |
| 9  | 1 | 0 | 0.586412  | -2.471444 | 0.405574  |
| 10 | 1 | 0 | 1.542824  | -1.55299  | -0.773485 |
| 11 | 7 | 0 | -0.522537 | -1.039930 | -0.709228 |
| 12 | 1 | 0 | -0.741781 | -1.387075 | -1.627712 |
| 13 | 9 | 0 | -1.959249 | 0.363180  | 0.506326  |
| 14 | 9 | 0 | 1.254383  | 1.356644  | -0.625714 |

G° (Hartree-Fock) -411.1348173

Imag. Freq. = 0

**4**

| Coordinates (Angstroms) |               |             |           |           |           |
|-------------------------|---------------|-------------|-----------|-----------|-----------|
| Center Number           | Atomic Number | Atomic Type | X         | Y         | Z         |
| 1                       | 6             | 0           | 1.444511  | 0.571046  | 0.409603  |
| 2                       | 6             | 0           | -0.044309 | 0.863379  | 0.521698  |
| 3                       | 6             | 0           | -0.696723 | -0.541759 | 0.494408  |
| 4                       | 6             | 0           | 1.474827  | -0.666831 | -0.503171 |
| 5                       | 1             | 0           | 1.992709  | 1.432333  | 0.025534  |
| 6                       | 1             | 0           | 1.837875  | 0.319112  | 1.399600  |
| 7                       | 1             | 0           | 2.347158  | -1.299338 | -0.331547 |
| 8                       | 1             | 0           | 1.473315  | -0.371560 | -1.556569 |
| 9                       | 1             | 0           | 0.237530  | -1.383457 | -0.163361 |
| 10                      | 1             | 0           | 0.345511  | -2.307763 | 0.220736  |
| 11                      | 7             | 0           | -0.958898 | -0.884869 | 1.500328  |
| 12                      | 1             | 0           | -0.335344 | 1.441402  | 1.399288  |
| 13                      | 9             | 0           | -1.926425 | -0.480142 | -0.185083 |
| 14                      | 9             | 0           | -0.455227 | 1.591239  | -0.598146 |

G° (Hartree-Fock) -411.1255847

Imag. Freq. = 0

**5 = 4**

**7 = 6 = 2**

**8 = 1**

**9**

| Coordinates (Angstroms) |               |             |           |           |           |
|-------------------------|---------------|-------------|-----------|-----------|-----------|
| Center Number           | Atomic Number | Atomic Type | X         | Y         | Z         |
| 1                       | 6             | 0           | 0.763949  | -0.421154 | 0.526499  |
| 2                       | 6             | 0           | -0.054227 | 0.882775  | 0.521099  |
| 3                       | 6             | 0           | -1.485318 | 0.361275  | 0.446206  |
| 4                       | 6             | 0           | -0.153278 | -1.456959 | -0.172487 |

|    |   |   |           |           |           |
|----|---|---|-----------|-----------|-----------|
| 5  | 1 | 0 | 0.996059  | -0.709784 | 1.555074  |
| 6  | 1 | 0 | 0.165144  | 1.550417  | 1.355388  |
| 7  | 1 | 0 | -1.807701 | 0.023733  | 1.439007  |
| 8  | 1 | 0 | -2.183412 | 1.124054  | 0.101481  |
| 9  | 1 | 0 | -0.333448 | -2.305743 | 0.493151  |
| 10 | 1 | 0 | 0.322464  | -1.832502 | -1.078678 |
| 11 | 7 | 0 | -1.432071 | -0.784667 | -0.471384 |
| 12 | 1 | 0 | -1.412534 | -0.43146  | -1.422812 |
| 13 | 9 | 0 | 0.222544  | 1.588684  | -0.657845 |
| 14 | 9 | 0 | 1.983141  | -0.268571 | -0.127802 |

G° (Hartree-Fock) -411.1169296

Imag. Freq. = 0

## 10

| Coordinates (Angstroms) |               |             |           |           |           |
|-------------------------|---------------|-------------|-----------|-----------|-----------|
| Center Number           | Atomic Number | Atomic Type | X         | Y         | Z         |
| 1                       | 6             | 0           | -0.840288 | -0.340015 | -0.395815 |
| 2                       | 6             | 0           | 0.415178  | -0.824704 | 0.334949  |
| 3                       | 6             | 0           | 0.975938  | 0.448914  | 0.956112  |
| 4                       | 6             | 0           | -0.604264 | 1.174517  | -0.610022 |
| 5                       | 1             | 0           | 0.432439  | 0.661532  | 1.883399  |
| 6                       | 1             | 0           | 2.038419  | 0.372512  | 1.187173  |
| 7                       | 1             | 0           | -1.399127 | 1.708734  | -0.081490 |
| 8                       | 1             | 0           | -0.642739 | 1.461769  | -1.660895 |
| 9                       | 1             | 0           | 0.707780  | 1.506337  | -0.026133 |
| 10                      | 1             | 0           | 1.418694  | 1.471844  | -0.748083 |
| 11                      | 7             | 0           | 0.216458  | -1.649317 | 1.019162  |
| 12                      | 1             | 0           | -1.018347 | -0.909730 | -1.307535 |
| 13                      | 9             | 0           | 1.321722  | -1.286673 | -0.643758 |
| 14                      | 9             | 0           | -1.952793 | -0.537102 | 0.441520  |

G° (Hartree-Fock) -411.1222198

Imag. Freq. = 0

## 11 = 10

## 12

| Coordinates (Angstroms) |               |             |           |           |           |
|-------------------------|---------------|-------------|-----------|-----------|-----------|
| Center Number           | Atomic Number | Atomic Type | X         | Y         | Z         |
| 1                       | 6             | 0           | 0.078071  | 0.877514  | 0.463337  |
| 2                       | 6             | 0           | 0.619429  | -0.555114 | 0.458574  |
| 3                       | 6             | 0           | -0.319531 | -1.267174 | -0.516695 |
| 4                       | 6             | 0           | -1.433744 | 0.680223  | 0.262182  |
| 5                       | 1             | 0           | 0.350526  | 1.450533  | 1.349900  |
| 6                       | 1             | 0           | 0.522279  | -0.980233 | 1.463957  |
| 7                       | 1             | 0           | -0.038796 | -1.006705 | -1.541614 |
| 8                       | 1             | 0           | -0.307408 | -2.352403 | -0.418811 |
| 9                       | 1             | 0           | -1.769262 | 1.387959  | -0.500235 |
| 10                      | 1             | 0           | -1.995938 | 0.880384  | 1.176622  |

|    |   |   |           |           |           |
|----|---|---|-----------|-----------|-----------|
| 11 | 7 | 0 | -1.641113 | -0.719135 | -0.187247 |
| 12 | 1 | 0 | -2.066841 | -1.263296 | 0.552682  |
| 13 | 9 | 0 | 0.610067  | 1.565161  | -0.636520 |
| 14 | 9 | 0 | 1.959698  | -0.620130 | 0.105837  |

G° (Hartree-Fock) -411.1160778      Imag. Freq. = 0

**13 = 12**

**15 = 14 = 10**

**16**

|               |               |             | Coordinates (Angstroms) |           |           |
|---------------|---------------|-------------|-------------------------|-----------|-----------|
| Center Number | Atomic Number | Atomic Type | X                       | Y         | Z         |
| 1             | 6             | 0           | 0.763141                | -0.423859 | 0.527318  |
| 2             | 6             | 0           | -0.052702               | 0.882419  | 0.522735  |
| 3             | 6             | 0           | -1.485217               | 0.365365  | 0.441240  |
| 4             | 6             | 0           | -0.158922               | -1.458857 | -0.166787 |
| 5             | 1             | 0           | 0.999228                | -0.711842 | 1.555181  |
| 6             | 1             | 0           | 0.165234                | 1.546701  | 1.360164  |
| 7             | 1             | 0           | -1.813196               | 0.028347  | 1.432396  |
| 8             | 1             | 0           | -2.179203               | 1.130612  | 0.093599  |
| 9             | 1             | 0           | -0.348223               | -2.299973 | 0.506168  |
| 10            | 1             | 0           | 0.317212                | -1.846603 | -1.067619 |
| 11            | 7             | 0           | -1.431657               | -0.780611 | -0.476107 |
| 12            | 1             | 0           | -1.403369               | -0.430481 | -1.427497 |
| 13            | 9             | 0           | 1.979500                | -0.274030 | -0.132595 |
| 14            | 9             | 0           | 0.230067                | 1.591486  | -0.652592 |

**17**

|               |               |             | Coordinates (Angstroms) |           |           |
|---------------|---------------|-------------|-------------------------|-----------|-----------|
| Center Number | Atomic Number | Atomic Type | X                       | Y         | Z         |
| 1             | 6             | 0           | -1.179704               | 0.089144  | 0.380986  |
| 2             | 6             | 0           | -0.042865               | -0.723475 | 1.015715  |
| 3             | 6             | 0           | 1.220210                | -0.170727 | 0.370274  |
| 4             | 6             | 0           | -0.498906               | 1.300856  | -0.282570 |
| 5             | 1             | 0           | -1.948303               | 0.372320  | 1.100119  |
| 6             | 1             | 0           | -0.168854               | -1.789908 | 0.835724  |
| 7             | 1             | 0           | -0.005527               | -0.547304 | 2.092791  |
| 8             | 1             | 0           | 2.139748                | -0.292760 | 0.942088  |
| 9             | 1             | 0           | -0.914530               | 2.251824  | 0.056290  |
| 10            | 1             | 0           | -0.645103               | 1.217510  | -1.364716 |
| 11            | 7             | 0           | 0.907363                | 1.182946  | 0.128512  |
| 12            | 1             | 0           | 1.577959                | 1.687664  | -0.435493 |
| 13            | 9             | 0           | 1.463406                | -0.899219 | -0.849324 |
| 14            | 9             | 0           | -1.838889               | -0.673531 | -0.598768 |

G° (Hartree-Fock) -411.1364769      Imag. Freq. = 0

**18**

| Center Number | Atomic Number | Atomic Type | Coordinates (Angstroms) |           |           |
|---------------|---------------|-------------|-------------------------|-----------|-----------|
|               |               |             | X                       | Y         | Z         |
| 1             | 6             | 0           | -1.187090               | -0.281477 | 0.502085  |
| 2             | 6             | 0           | 0.076096                | -1.104002 | 0.295394  |
| 3             | 6             | 0           | 1.033177                | -0.163620 | -0.462511 |
| 4             | 6             | 0           | -0.671042               | 1.152822  | 0.539521  |
| 5             | 1             | 0           | -1.780541               | -0.570571 | 1.370525  |
| 6             | 1             | 0           | 0.525570                | -1.355222 | 1.259049  |
| 7             | 1             | 0           | -0.383763               | 1.412593  | 1.565141  |
| 8             | 1             | 0           | -1.425027               | 1.865870  | 0.205536  |
| 9             | 7             | 0           | 0.498039                | 1.148495  | -0.344350 |
| 10            | 1             | 0           | 0.377831                | 1.635953  | -1.217570 |
| 11            | 1             | 0           | -0.126980               | -2.029716 | -0.241642 |
| 12            | 9             | 0           | -2.025297               | -0.435438 | -0.627316 |
| 13            | 1             | 0           | 1.213293                | -0.444720 | -1.500435 |
| 14            | 9             | 0           | 2.314907                | -0.250782 | 0.152084  |

G° (Hartree-Fock) 411.1348201

Imag. Freq. = 0

**19**

| Center Number | Atomic Number | Atomic Type | Coordinates (Angstroms) |           |           |
|---------------|---------------|-------------|-------------------------|-----------|-----------|
|               |               |             | X                       | Y         | Z         |
| 1             | 6             | 0           | 1.085146                | -0.218668 | 0.508728  |
| 2             | 6             | 0           | 0.025619                | -1.164342 | -0.083008 |
| 3             | 6             | 0           | -1.113250               | -0.250310 | -0.531300 |
| 4             | 6             | 0           | 0.461688                | 1.174921  | 0.433675  |
| 5             | 1             | 0           | 0.461645                | -1.690899 | -0.932990 |
| 6             | 1             | 0           | 1.211548                | 1.926551  | 0.185114  |
| 7             | 1             | 0           | 0.006050                | 1.428662  | 1.399752  |
| 8             | 1             | 0           | -0.526708               | 1.024724  | -0.639318 |
| 9             | 7             | 0           | -1.175948               | 1.789660  | -0.766192 |
| 10            | 1             | 0           | -0.337655               | -1.899077 | 0.634272  |
| 11            | 1             | 0           | -1.642068               | -0.553151 | -1.433656 |
| 12            | 1             | 0           | 1.401115                | -0.486769 | 1.516404  |
| 13            | 9             | 0           | -2.135795               | -0.284587 | 0.498183  |
| 14            | 9             | 0           | 2.247690                | -0.264041 | -0.286632 |

G° (Hartree-Fock) -411.137674

Imag. Freq. = 0

**24 = 21 = 20 = 17****22 = 19****23 = 18**

Standard orientations for the difluorinated pyrrolidines (DMSO, B3LYP-GD3BJ/6-311++G\*\*)

**1**

|                   |               |             | Coordinates (Angstroms) |           |           |
|-------------------|---------------|-------------|-------------------------|-----------|-----------|
| Center Number     | Atomic Number | Atomic Type | X                       | Y         | Z         |
| 1                 | 6             | 0           | 0.282718                | -1.332334 | 0.403692  |
| 2                 | 6             | 0           | -0.649786               | -0.533484 | -0.504240 |
| 3                 | 6             | 0           | -0.039251               | 0.864359  | -0.497135 |
| 4                 | 6             | 0           | 1.648982                | -0.631618 | 0.237427  |
| 5                 | 1             | 0           | -0.075348               | -1.243315 | 1.431120  |
| 6                 | 1             | 0           | 0.315004                | -2.387266 | 0.136172  |
| 7                 | 1             | 0           | -0.680697               | -0.910156 | -1.527087 |
| 8                 | 1             | 0           | -0.375409               | 1.557836  | -1.263416 |
| 9                 | 1             | 0           | 2.346090                | -1.234302 | -0.348010 |
| 10                | 1             | 0           | 2.111105                | -0.415685 | 1.204200  |
| 11                | 7             | 0           | 1.314970                | 0.601491  | -0.501392 |
| 12                | 9             | 0           | -0.496441               | 1.521269  | 0.762223  |
| 13                | 9             | 0           | -1.977150               | -0.538779 | -0.037826 |
| 14                | 1             | 0           | 1.960803                | 1.378505  | -0.481275 |
| G° (Hartree-Fock) | -411.1473709  |             | Imag. Freq. =           | 0         |           |

**2**

|                   |               |             | Coordinates (Angstroms) |           |           |
|-------------------|---------------|-------------|-------------------------|-----------|-----------|
| Center Number     | Atomic Number | Atomic Type | X                       | Y         | Z         |
| 1                 | 6             | 0           | 0.746059                | 0.792271  | 0.919170  |
| 2                 | 6             | 0           | 0.673446                | -0.628175 | 0.374730  |
| 3                 | 6             | 0           | -0.619595               | -0.634673 | -0.428434 |
| 4                 | 6             | 0           | -0.099783               | 1.644345  | -0.055003 |
| 5                 | 1             | 0           | 0.315885                | 0.806386  | 1.921622  |
| 6                 | 1             | 0           | 1.781451                | 1.124975  | 0.991983  |
| 7                 | 1             | 0           | 0.730990                | -1.417355 | 1.119773  |
| 8                 | 1             | 0           | -0.754471               | -1.438120 | -1.147181 |
| 9                 | 1             | 0           | 0.508749                | 2.336325  | -0.640719 |
| 10                | 1             | 0           | -0.855143               | 2.223530  | 0.482566  |
| 11                | 7             | 0           | -0.706391               | 0.639319  | -0.942499 |
| 12                | 1             | 0           | -1.504697               | 0.891067  | -1.508843 |
| 13                | 9             | 0           | -1.683151               | -0.923445 | 0.597129  |
| 14                | 9             | 0           | 1.741063                | -0.859294 | -0.539850 |
| G° (Hartree-Fock) | -411.147371   |             | Imag. Freq. =           | 0         |           |

**3**

|               |               |             | Coordinates (Angstroms) |           |          |
|---------------|---------------|-------------|-------------------------|-----------|----------|
| Center Number | Atomic Number | Atomic Type | X                       | Y         | Z        |
| 1             | 6             | 0           | -0.975470               | 0.400275  | 0.980594 |
| 2             | 6             | 0           | -0.365537               | -0.837278 | 0.351886 |



|    |   |   |           |           |           |
|----|---|---|-----------|-----------|-----------|
| 3  | 6 | 0 | 0.831638  | -0.290159 | -0.420561 |
| 4  | 6 | 0 | -0.703134 | 1.501069  | -0.055127 |
| 5  | 1 | 0 | -2.033514 | 0.266257  | 1.204868  |
| 6  | 1 | 0 | -0.447285 | 0.606901  | 1.914749  |
| 7  | 1 | 0 | -0.126851 | -1.652147 | 1.030487  |
| 8  | 1 | 0 | 1.148753  | -0.891982 | -1.268908 |
| 9  | 1 | 0 | -0.561261 | 2.477014  | 0.412568  |
| 10 | 1 | 0 | -1.521696 | 1.580504  | -0.776788 |
| 11 | 7 | 0 | 0.531679  | 1.037171  | -0.715572 |
| 12 | 1 | 0 | 0.707971  | 1.351236  | -1.658458 |
| 13 | 9 | 0 | 1.975134  | -0.373731 | 0.511074  |
| 14 | 9 | 0 | -1.265451 | -1.364205 | -0.621104 |

G° (Hartree-Fock) -411.1490084      Imag. Freq. = 0

#### 4

| Center Number | Atomic Number | Atomic Type | Coordinates (Angstroms) |           |           |
|---------------|---------------|-------------|-------------------------|-----------|-----------|
|               |               |             | X                       | Y         | Z         |
| 1             | 6             | 0           | -0.282702               | -1.332353 | 0.403666  |
| 2             | 6             | 0           | 0.649805                | -0.533474 | -0.504241 |
| 3             | 6             | 0           | 0.039241                | 0.864357  | -0.497139 |
| 4             | 6             | 0           | -1.648965               | -0.631622 | 0.237451  |
| 5             | 1             | 0           | -0.314999               | -2.387273 | 0.136096  |
| 6             | 1             | 0           | 0.075376                | -1.243392 | 1.431095  |
| 7             | 1             | 0           | 0.680736                | -0.910136 | -1.527092 |
| 8             | 1             | 0           | 0.375404                | 1.557839  | -1.263415 |
| 9             | 1             | 0           | -2.111030               | -0.415653 | 1.204244  |
| 10            | 1             | 0           | -2.346116               | -1.234309 | -0.347931 |
| 11            | 7             | 0           | -1.314974               | 0.601465  | -0.501419 |
| 12            | 1             | 0           | -1.960811               | 1.378475  | -0.481272 |
| 13            | 9             | 0           | 0.496401                | 1.521272  | 0.762228  |
| 14            | 9             | 0           | 1.977153                | -0.538745 | -0.037807 |

G° (Hartree-Fock) -411.1473709      Imag. Freq. = 0

#### 5

| Center Number | Atomic Number | Atomic Type | Coordinates (Angstroms) |           |           |
|---------------|---------------|-------------|-------------------------|-----------|-----------|
|               |               |             | X                       | Y         | Z         |
| 1             | 6             | 0           | -0.479401               | -1.269665 | -0.459934 |
| 2             | 6             | 0           | 0.528000                | -0.617270 | 0.474690  |
| 3             | 6             | 0           | 0.135464                | 0.859079  | 0.460259  |
| 4             | 6             | 0           | -1.753747               | -0.482228 | -0.134015 |
| 5             | 1             | 0           | -0.171275               | -1.102791 | -1.495137 |
| 6             | 1             | 0           | -0.587100               | -2.339315 | -0.286364 |
| 7             | 1             | 0           | 0.437560                | -0.992237 | 1.496355  |
| 8             | 1             | 0           | 0.451573                | 1.443304  | 1.320832  |
| 9             | 1             | 0           | -2.283364               | -0.933885 | 0.710757  |
| 10            | 1             | 0           | -2.439543               | -0.425849 | -0.981129 |

|    |   |   |           |           |           |
|----|---|---|-----------|-----------|-----------|
| 11 | 7 | 0 | -1.234742 | 0.852959  | 0.224955  |
| 12 | 9 | 0 | 0.857640  | 1.498367  | -0.657577 |
| 13 | 9 | 0 | 1.861067  | -0.833764 | 0.082934  |
| 14 | 1 | 0 | -1.814920 | 1.459143  | 0.785782  |

G° (Hartree-Fock) -411.1469837      Imag. Freq. = 0

## 6

| Coordinates (Angstroms) |               |             |           |           |           |
|-------------------------|---------------|-------------|-----------|-----------|-----------|
| Center Number           | Atomic Number | Atomic Type | X         | Y         | Z         |
| 1                       | 6             | 0           | 0.975750  | 0.400246  | 0.980413  |
| 2                       | 6             | 0           | 0.365348  | -0.837179 | 0.351913  |
| 3                       | 6             | 0           | -0.831436 | -0.289954 | -0.420911 |
| 4                       | 6             | 0           | 0.703454  | 1.501166  | -0.055141 |
| 5                       | 1             | 0           | 0.447903  | 0.607016  | 1.914727  |
| 6                       | 1             | 0           | 2.033800  | 0.265882  | 1.204489  |
| 7                       | 1             | 0           | 1.522078  | 1.580884  | -0.776713 |
| 8                       | 1             | 0           | 0.561217  | 2.477049  | 0.412587  |
| 9                       | 7             | 0           | -0.531009 | 1.036842  | -0.715657 |
| 10                      | 1             | 0           | -1.149152 | -0.891994 | -1.268862 |
| 11                      | 1             | 0           | 0.126395  | -1.651908 | 1.030559  |
| 12                      | 9             | 0           | -1.975636 | -0.373507 | 0.511209  |
| 13                      | 9             | 0           | 1.265285  | -1.364732 | -0.620973 |
| 14                      | 1             | 0           | -0.710709 | 1.353657  | -1.656951 |

G° (Hartree-Fock) -411.14903      Imag. Freq. = 0

## 7 = 2

## 8 = 4

## 9

| Coordinates (Angstroms) |               |             |           |           |           |
|-------------------------|---------------|-------------|-----------|-----------|-----------|
| Center Number           | Atomic Number | Atomic Type | X         | Y         | Z         |
| 1                       | 6             | 0           | 0.717111  | -0.491135 | 0.548382  |
| 2                       | 6             | 0           | -0.011113 | 0.870935  | 0.554160  |
| 3                       | 6             | 0           | -1.469058 | 0.481567  | 0.353148  |
| 4                       | 6             | 0           | -0.291226 | -1.474940 | -0.080939 |
| 5                       | 1             | 0           | 1.013683  | -0.778770 | 1.556374  |
| 6                       | 1             | 0           | 0.194982  | 1.482089  | 1.430778  |
| 7                       | 1             | 0           | -1.892188 | 0.189435  | 1.320431  |
| 8                       | 1             | 0           | -2.061518 | 1.301029  | -0.054041 |
| 9                       | 1             | 0           | -0.622391 | -2.179391 | 0.686614  |
| 10                      | 1             | 0           | 0.160499  | -2.040214 | -0.896449 |
| 11                      | 7             | 0           | -1.447673 | -0.685145 | -0.544882 |
| 12                      | 1             | 0           | -1.265093 | -0.358258 | -1.490113 |
| 13                      | 9             | 0           | 0.416440  | 1.621317  | -0.572030 |
| 14                      | 9             | 0           | 1.909276  | -0.414480 | -0.204406 |

G° (Hartree-Fock) -411.1318907

Imag. Freq. = 0

**10**

| Center Number | Atomic Number | Atomic Type | Coordinates (Angstroms) |           |           |
|---------------|---------------|-------------|-------------------------|-----------|-----------|
|               |               |             | X                       | Y         | Z         |
| 1             | 6             | 0           | -0.414195               | -0.806645 | 0.347891  |
| 2             | 6             | 0           | 0.836325                | -0.313158 | -0.385499 |
| 3             | 6             | 0           | 0.628874                | 1.207471  | -0.550677 |
| 4             | 6             | 0           | -1.033214               | 0.461674  | 0.913877  |
| 5             | 1             | 0           | -0.208615               | -1.599483 | 1.064979  |
| 6             | 1             | 0           | 1.372906                | 1.714332  | 0.071324  |
| 7             | 1             | 0           | 0.755102                | 1.537705  | -1.580947 |
| 8             | 1             | 0           | -0.539060               | 0.690645  | 1.864165  |
| 9             | 1             | 0           | -2.104588               | 0.367888  | 1.091239  |
| 10            | 1             | 0           | -0.729623               | 1.516865  | -0.066192 |
| 11            | 7             | 0           | -1.380739               | 1.434300  | -0.841756 |
| 12            | 1             | 0           | -1.293903               | -1.350088 | -0.633091 |
| 13            | 9             | 0           | 0.998851                | -0.853542 | -1.316552 |
| 14            | 9             | 0           | 1.972432                | -0.561684 | 0.428351  |

G° (Hartree-Fock) -411.1351838

Imag. Freq. = 0

**11 = 10**

**12**

| Center Number | Atomic Number | Atomic Type | Coordinates (Angstroms) |           |           |
|---------------|---------------|-------------|-------------------------|-----------|-----------|
|               |               |             | X                       | Y         | Z         |
| 1             | 6             | 0           | 0.083915                | 0.869491  | 0.475331  |
| 2             | 6             | 0           | 0.592211                | -0.570169 | 0.464910  |
| 3             | 6             | 0           | -0.346687               | -1.267099 | -0.516528 |
| 4             | 6             | 0           | -1.422155               | 0.712156  | 0.242243  |
| 5             | 1             | 0           | 0.357816                | 1.438740  | 1.360869  |
| 6             | 1             | 0           | 0.501017                | -0.996238 | 1.466430  |
| 7             | 1             | 0           | -0.058665               | -1.015068 | -1.542298 |
| 8             | 1             | 0           | -0.357360               | -2.350740 | -0.407671 |
| 9             | 1             | 0           | -1.726459               | 1.419284  | -0.533927 |
| 10            | 1             | 0           | -1.992050               | 0.932754  | 1.145279  |
| 11            | 7             | 0           | -1.661184               | -0.692068 | -0.189989 |
| 12            | 1             | 0           | -2.050516               | -1.207748 | 0.592280  |
| 13            | 9             | 0           | 0.664181                | 1.557089  | -0.627902 |
| 14            | 9             | 0           | 1.948130                | -0.650731 | 0.100482  |

G° (Hartree-Fock) -411.132017

Imag. Freq. = 0

**13 = 12**

**15 = 14 = 10**

**16 = 9****17**

| Center Number     | Atomic Number | Atomic Type | Coordinates (Angstroms) |           |           |
|-------------------|---------------|-------------|-------------------------|-----------|-----------|
|                   |               |             | X                       | Y         | Z         |
| 1                 | 6             | 0           | -1.187346               | 0.050100  | 0.375980  |
| 2                 | 6             | 0           | -0.009639               | -0.546091 | 1.141034  |
| 3                 | 6             | 0           | 1.201682                | -0.032767 | 0.384338  |
| 4                 | 6             | 0           | -0.630222               | 1.298827  | -0.314085 |
| 5                 | 1             | 0           | -2.063540               | 0.242746  | 0.990380  |
| 6                 | 1             | 0           | -0.055262               | -1.632341 | 1.201924  |
| 7                 | 1             | 0           | 0.008950                | -0.139668 | 2.155266  |
| 8                 | 1             | 0           | 2.156461                | -0.047984 | 0.903536  |
| 9                 | 1             | 0           | -1.041905               | 2.210577  | 0.124451  |
| 10                | 1             | 0           | -0.889950               | 1.278312  | -1.376214 |
| 11                | 7             | 0           | 0.819170                | 1.222580  | -0.072998 |
| 12                | 1             | 0           | 1.436854                | 1.704677  | -0.711999 |
| 13                | 9             | 0           | 1.451503                | -0.985855 | -0.747420 |
| 14                | 9             | 0           | -1.621797               | -0.880233 | -0.619243 |
| G° (Hartree-Fock) | -411.15235    |             | Imag. Freq. =           | 0         |           |

**18**

| Center Number     | Atomic Number | Atomic Type | Coordinates (Angstroms) |           |           |
|-------------------|---------------|-------------|-------------------------|-----------|-----------|
|                   |               |             | X                       | Y         | Z         |
| 1                 | 6             | 0           | -1.181672               | -0.277894 | 0.512496  |
| 2                 | 6             | 0           | 0.074072                | -1.103632 | 0.292484  |
| 3                 | 6             | 0           | 1.017656                | -0.164976 | -0.472710 |
| 4                 | 6             | 0           | -0.668733               | 1.153234  | 0.542545  |
| 5                 | 1             | 0           | -1.775113               | -0.567526 | 1.377825  |
| 6                 | 1             | 0           | 0.515674                | -1.351083 | 1.260881  |
| 7                 | 1             | 0           | -0.379200               | 1.404306  | 1.568012  |
| 8                 | 1             | 0           | -1.415801               | 1.872888  | 0.208851  |
| 9                 | 7             | 0           | 0.503925                | 1.148697  | -0.348858 |
| 10                | 1             | 0           | 0.351149                | 1.607709  | -1.236012 |
| 11                | 1             | 0           | -0.126226               | -2.031979 | -0.241226 |
| 12                | 9             | 0           | -2.039462               | -0.434351 | -0.625392 |
| 13                | 1             | 0           | 1.216314                | -0.443875 | -1.504994 |
| 14                | 9             | 0           | 2.332549                | -0.251394 | 0.154256  |
| G° (Hartree-Fock) | -411.1509097  |             | Imag. Freq. =           | 0         |           |

**19**

| Center Number | Atomic Number | Atomic Type | Coordinates (Angstroms) |           |           |
|---------------|---------------|-------------|-------------------------|-----------|-----------|
|               |               |             | X                       | Y         | Z         |
| 1             | 6             |             | 1.094192                | -0.227227 | 0.529331  |
| 2             | 6             |             | 0.013348                | -1.167025 | -0.018407 |

|    |   |           |           |           |
|----|---|-----------|-----------|-----------|
| 3  | 6 | -1.077570 | -0.242105 | -0.552063 |
| 4  | 6 | 0.476731  | 1.162274  | 0.472360  |
| 5  | 1 | 0.426144  | -1.786094 | -0.816226 |
| 6  | 1 | 1.219258  | 1.931409  | 0.259130  |
| 7  | 1 | -0.000942 | 1.389008  | 1.433384  |
| 8  | 7 | -0.488842 | 1.022317  | -0.625068 |
| 9  | 1 | -1.112395 | 1.801227  | -0.798566 |
| 10 | 1 | -0.384681 | -1.826244 | 0.752216  |
| 11 | 1 | -1.582725 | -0.548675 | -1.464042 |
| 12 | 1 | 1.472625  | -0.498838 | 1.511746  |
| 13 | 9 | -2.189306 | -0.261671 | 0.444517  |
| 14 | 9 | 2.227573  | -0.268720 | -0.343349 |

G° (Hartree-Fock) -411.1525187

Imag. Freq. = 0

**24 = 21 = 20 = 17**

**22 = 19**

**23 = 18**
